# Supplementary material for: Facile Fabrication of Dumbbell-Like β-Bi2O3/Graphene Nanocomposites and Their Highly Efficient Photocatalytic Activity
Source: MDPI journal article supplement (doi:10.3390/ma11081359), 2018-08-06
Supplement: s1 [file s1]

## Supplementary materials

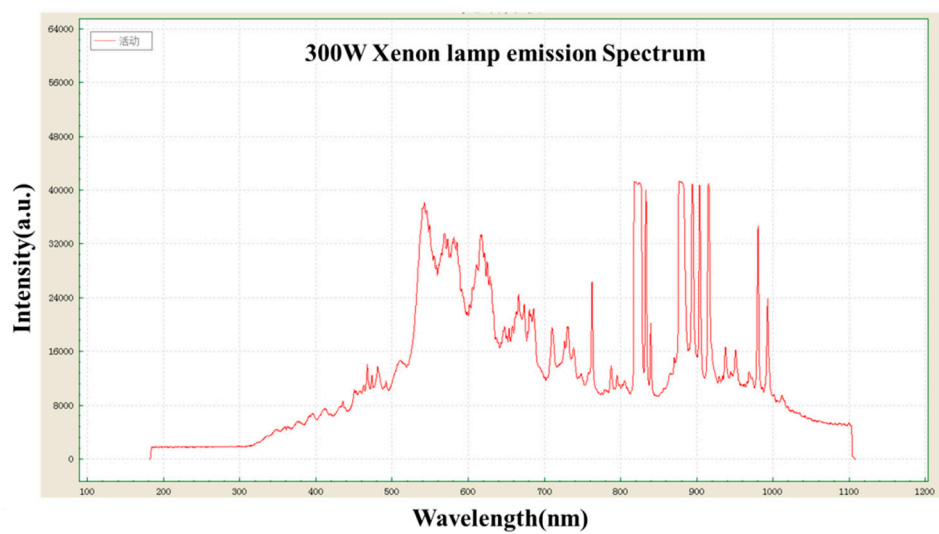

**Figure S1.** The emission spectrum of a 300-W Xenon lamp (CEL-HXF300, AULTT, Beijing, China).
